# Supplementary material
Source: Research Square preprint supplement (doi:10.21203/rs.3.rs-9399910/v1)
Supplement: Supplementary file 1 [file f88971bc76cf6eec3c871ad4.docx]

**Supplementary information**

**Papakyriacou et al.**

**Supplemental figure legends**

**Figure S1. Supplementary data to Figure 1, Figure 2 and Figure 3.** Label-free quantitative proteomics was performed by mass spectrometry in THP1 control (ctrl) and *NEDD8* knock-out (KO) cells using four biological replicates per condition. **A)** Principal component analysis (PCA) of library-size normalized protein intensity in ctrl and KO cells was shown. Control or *NEDD8* KO cells (2 × 104 cells per well) were treated with LPS (TLR4) or Pam3CSK4 (TLR1/2) at indicated doses for 20 h and **B)** **S**ecretion of soluble pro-inflammatory cytokine, CXCL-10 (n=4), was measured using a multiplex flow cytometry panel (Legendplex). Values are presented as mean ± SD, and statistical significance was assessed using unpaired two tail *T* test. THP-1 control or *NEDD8* KO cells (2 × 104 cells per well) were treated with LPS (n=5) or Pam3CSK4 (n=6) for 20 h. **C)** Surface mean fluorescence intensity (MFI) of HLA-ABC was quantified among the groups using flow cytometry. **D)** THP1 control and *NEDD8* KO cell lines (1 × 104 cells/well) were treated with the neddylation inhibitor pevonedistat (72 h) and the dose-dependent effects on cell viability were quantified using presto blue reagent and dose response curves were calculated. Data represent three biological replicates.

**Figure S2. Supplementary data to Figure 3. A)** Principal component analysis (PCA) of median normalized gRNA counts in THP1 ctrl and *NEDD8* KO 4 days or 21 days after gRNA library transduction was shown. **B)** Commonly essential, unique essential genes or highly unique essential (rank difference > 2000, log10(FDR.difference) > 1) in THP1 control or KO cells were shown in the volcano plot. Genes in the post-translational modification pathway were highlighted. Differences in essential gene rank versus log10(FDR) were displayed, with key hits highlighted. **C)** THP1 control or *NEDD8* KO cells were treated with simvastatin (1 μM, 4 days). Morphological features of 1 × 103 cells per condition were examined by transmission electron microscopy. Representative images from three technical replicates are shown. Scale bar: 2 μm

**Figure S3. Supplementary data to Figure 4. A)** THP1 control cells (1 x 105 cells/well) were incubated with simvastatin (1 μM) or 0.1% DMSO for 3 days. LPS was added to the cells at the indicated doses for 20 h. Human multiplex flow-cytometry-based Legendplex assay was performed to analyze soluble cytokines i.e., IL-1B (n=6), ΤNFA (n=6) and IFNG (n=4). Data was presented as mean ± SD, and statistical significance was determined by unpaired two tailed *T* test. **B)** Primary human CD14+ monocytes (3 x 105 cells/well) were treated with simvastatin (1 μM) or 0.1% DMSO for 2 days, followed by stimulation with the indicated doses of LPS for an additional 20 h. Soluble cytokines including GM-CSF (n=3) , CXCL-10 (n=4) and IL-10 (n=3), were quantified using a human multiplex flow-cytometry-based Legendplex assay. Human primary CD14+ cells (3 × 105 cells/well) were treated with simvastatin (1 μM) together with **C)** rapamycin (n=3), **D)** ruxolitinib (n=4) or **E)** MCC950 (n=4), at the indicated concentrations for 2 days. LPS (1 μg/ml) was then added for an additional 20 h. Soluble cytokine concentration was determined using the Legendplex assay. Data was presented as mean ± SD. Statistical significance was determined byunpaired two tailed *T* test . * *P* < 0.05; ** *P* < 0.01; *** *P* < 0.001; ns, not significant.

**Figure S4. Supplementary data to Figure 5. A)** Naïve C57BL6NTac mice were treated with simvastatin (8.2 mg/kg) on day 0, 1, 2 and 3 intraperitoneally (i.p.) followed by LPS treatment i.p. (5 μg/mouse). At the study endpoint,concentrations of a panel of murine pro-inflammatory cytokines in the serum were analyzed by flow cytometry using a murine multiplex cytokine macrophage/microglia panel (Legendplex). Mean fluorescence intensity (MFI) of surface **B)** H2-Kd/Dd, **C)** PD-L1 on different myeloid subtypes, or **D)** MHC-II on dendritic cells, was analyzed by flow cytometry on spleonocytes isolated from different groups. **E)** The intensity ofCD69+ on lymphocyte subsets was compared among treatment groups. Each dot represented values from an individual spleen and at least 7 mice per group were included. Average values were shown and unpaired two tailed *T* test was used for statistical analysis.

**Supplemental Tables**

**Supplemental Table 1:** Antibodies

| Name | Clone | Application | Product information |
| --- | --- | --- | --- |
| Anti-human/mouse NEDD8 | Rabbit monoclonal [Y297] IgG | WB | Abcam/ab81264 |
| Anti-Rabbit IgG HRP-linked Antibody | Goat IgG | WB | Cell Signaling Technology/7074S |
| Anti-mouse IgG HRP-linked- Antibody | Horse IgG | WB | Cell Signaling Technology/7076S |
| β-Actin (ACTBD11B7) | Mouse IgG1, k | WB | Sant Cruz Biotechnology/ sc-81178 |
| FITC anti-human CD274 (B7-H1, PD-L1) | MIH2, mouse IgG1, k | FACS | Biolegend/393606 |
| APC anti-human HLA-A,B,C | W6/32, mouse IgG2a, k | FACS | Biolegend/311410 |
| PE anti-human CD119 (IFN-γ R a chain) | GIR-208, mouse IgG1, k | FACS | Biolegend/308606 |
| HLA-DR, DP, DQ anti human PE | REA332, recombinant human IgG1 | FACS | MiltenyiBiotec/130-125-984 |
| PerCP-Cy5.5 anti-mouse CD3 | 17A2, rat IgG2b, k | FACS | Biolegend/100218 |
| Brilliant Violet 650 anti-mouse CD8a | 53-6.7, rat IgG2a, k | FACS | Biolegend/100742 |
| PE-Fire 700 anti-mouse CD45 | 30-F11, rat IgG2b, k | FACS | Biolegend/103178 |
| APC-Cy7 anti-mouse Ly6G | 1A8, rat IgG2a, k | FACS | Biolegend/127624 |
| PE-Dazzle 594 anti-mouse/human CD11b | M1/70, rat IgG2b, k | FACS | Biolegend/101256 |
| APC anti-mouse F4/80 | BM8, rat IgG2a, k | FACS | Biolegend/123116 |
| Spark UV 387 anti-mouse CD4 | GK1.5, rat IgG2b,k | FACS | Biolegend/100492 |
| PE anti-mouse CD11c | N418, armenian hamster IgG | FACS | eBioscience/12-0114-81 |
| Brilliant Violet 650 anti-mouse I-A/I-E | M5/114.15.2, rat IgG2b, k | FACS | Biolegend/107641 |
| Brilliant Violet 785 anti-mouse CD223 (LAG-3) | C9B7W, rat IgG, k | FACS | Biolegend/125219 |
| Brilliant Violet 421 anti-mouse CD279 (PD-1) | 29F.1A12, rat IgG2a, k | FACS | Biolegend/135221 |
| Brilliant Violet 605 anti-mouse NK1.1 | PK136, mouse IgG2a, k | FACS | Biolegend/108739 |
| PerCP/Cyanine 5.5 anti-mouse Ly-6C | HK1.4, rat IgGc, k | FACS | Biolegend/128012 |
| Brilliant violet 421 anti-mouse CD274 (B7-H1,PD-L1) | 10F.9G2, rat IgG2b, k | FACS | Biolegend/124315 |
| FITC anti-Mo MHC class I (H2-Kd/Dd) | 34-1-2S, mouse IgG2a, k | FACS | eBioscience/11-5998-82 |
| Brilliant ultra violet 805 anti-Hu/Mo arginase 1 | A1exF5, rat IgG2a, k | FACS | eBioscience/368-3697-82 |
| PE/Dazzle 594 anti-mouse CD19 | 6D5, rat IgG2a, k | FACS | Biolegend/115554 |
| PE-Cy5 anti-Mo CD69 | H1.2F3, armenian hamster IgG | FACS | eBioscience/15-0691-82 |
| Mouse detection Ab | - | Legendplex | Biolegend/740851 |
| Human detection Ab | - | Legendplex | Biolegend/ 741273 |

**Supplemental Table 2:** Other reagents

| Name | Application | Product information |
| --- | --- | --- |
| Lymphoprep | Cell isolation | StemCell/07851-07861 |
| SepMate tubes | Cell isolation | StemCell/85450 |
| Red blood cell lysis buffer | Cell isolation | Biolegend/420301 |
| Neon transfection system kit | CRISPR KO | Invitrogen/MPK10025 |
| Alt-R® S.p. Cas9 Nuclease V3 | CRISPR KO | IDT/1081058 |
| TracrRNA | CRISPR KO | IDT/1072534 |
| IDTE buffer | CRISPR KO | IDT/11-01-02-02 |
| Nuclease free duplex buffer | CRISPR KO | IDT/11-01-03-01 |
| Tween 20 | WB | Fisher bioreagents/9005-64-5 |
| True Nuclear 10x Perm | FACS | Biolegend/73163 |
| True Nuclear Fix Diluent | FACS | Biolegend/73160 |
| True Nuclear 4x Fix Concentrate | FACS | Biolegend/73158 |
| Aqua fixable live/dead marker | FACS | Invitrogen by Thermo Fisher Scientific/L34966A |
| Mycoplasma detection kit | Cell culture | Lonza/LT07-218 |
| IMDM medium | Cell culture | Thermo Fisher Scientific /12440-053 |
| Heat inactivated FBS | Cell culture | Thermo Fisher Scientific /10500-064 |
| Human Type AB Serum | Cell culture | MP Biomedicals/ 2930949 |
| PenStrep | Cell culture | Thermo Fisher Scientific /15140-122 |
| PBS | Cell culture | Thermo Fisher Scientific /20012-027 |
| Trypan Blue Solution, 0.4% | Cell counting | VWR/K940 |
| WB gels (NuPAGE 4-12% Bis-Tris Gel) | WB | Invitrogen by Thermo Fisher Scientific/NP0321BOX |
| Protein Ladder | WB | Thermo Scientific/26619 |
| iBlot 2NC Regular Stacks | WB | Invitrogen by Thermo Fisher Scientific/IB23001 |
| MOPS SDS Running Buffer (20x) | WB | Novex by life technologies/NP0001 |
| Transfer Buffer (20x) | WB | Novex by life technologies/NP0006-1 |
| LDL Sample buffer (4x) | WB | Novex by life technologies/B0007 |
| SKIM Milk POWDER | WB | OXOID/LP0033 |
| Ponceaus S solution for electrophoresis (0.2%) | WB | Serva/33427.01 |
| Pico substrate | WB | Thermo Scientific/34580 |
| Femto substrate | WB | Thermo Scientific/34095 |
| RIPA Buffer | WB | Thermo Scientific/89900 |
| BCA Protein Assay Kit | WB | Thermo Scientific/23225 |
| Protease and Phosphatase Inhibitor Cocktail | WB | Thermo Scientific/78446 |
| PrestoBlue cell viability reagent | Cell viability | Invitrogen by Thermo Fisher Scientific/A13262 |
| Dimethyl Sulfoxide (DMSO) | In vitro | Fisher bioreagents/67-68-5 |
| mCXCL1 | Legendplex | Biolegend/740853 |
| mTGF-B1 | Legendplex | Biolegend/740854 |
| mIL-18 | Legendplex | Biolegend/740855 |
| mIL-23 | Legendplex | Biolegend/740856 |
| mCCL22 | Legendplex | Biolegend/740857 |
| mIL-10 | Legendplex | Biolegend/740858 |
| mIL-12p70 | Legendplex | Biolegend/740859 |
| mIL-6 | Legendplex | Biolegend/740860 |
| mTNF-a | Legendplex | Biolegend/740861 |
| mG-CSF | Legendplex | Biolegend/740862 |
| mCCL17 | Legendplex | Biolegend/740863 |
| mIL-12p40 | Legendplex | Biolegend/740864 |
| mIL-1B | Legendplex | Biolegend/740865 |
| Mouse standard | Legendplex | Biolegend/ 740852 |
| Mouse buffer set | Legendplex | Biolegend/ 741446 |
| hIL-1β | Legendplex | Biolegend/ 741344 |
| hIL-6 | Legendplex | Biolegend/ 740356 |
| hTNF-α | Legendplex | Biolegend/ 740359 |
| hIP-10 | Legendplex | Biolegend/ 740363 |
| hGM-CSF | Legendplex | Biolegend/ 740362 |
| hIFN-β | Legendplex | Biolegend/ 741278 |
| hIL-10 | Legendplex | Biolegend/ 740358 |
| hIFN-γ | Legendplex | Biolegend/ 741280 |
| hStandard | Legendplex | Biolegend/ 741274 |
| Pevonedistat (MLN4924) | Inhibitor | MedChemExpress/HY-70062/CS-0348 |
| Simvastatin acid (10nM x 1ml in DMSO) | Inhibitor | MedChemExpress/HY-119695A |
| MCC950 | Inhibitor | MedChemExpress/HY-12815A |
| Rapamycin | Inhibitor | StemCell/ 73362 |
| Ruxolitinib | Inhibitor | MedChemExpress/HY-50856 |
| Lipopolysacharide (LPS) | Functional | Invitrogen/00-4976-93 |
| Pam3CSK4 | Functional | Tocris/4633 |

**Supplementary Table 3:** sequences

| Name | Sequence |
| --- | --- |
| Hu NEDD8 crRNA4 | TGACATTGAACCTACAGACA |
| carrier DNA | CCAGCAGAACACCCCCATCGGCGACGGCCCCGTGCTGCTGCCCGACAACCACTACCTGAGCACCCAGTCCGCCCTGAGCAAAGACCCCAACGAGA |

**Supplementary Table 4:** Conversion of human clinical doses to equivalent animal doses

| Clinical doses, simvastatin | Animal doses |
| --- | --- |
| 40 mg/tablet | 8.2 mg/kg |

**Supplementary Table 5:** Identified peptides from proteomic analysis

| **Sample** | **No. Identified peptides** |
| --- | --- |
| Ctrl 1 | 2922 |
| Ctrl 2 | 3101 |
| Ctrl 3 | 3181 |
| Ctrl 4 | 3044 |
| *NEDD8* KO 1 | 3184 |
| *NEDD8* KO 2 | 3053 |
| *NEDD8* KO 3 | 3238 |
| *NEDD8* KO 4 | 3135 |
